# Supplementary material for: Improved DNA equilibrium binding affinity determinations of platinum(ii) complexes using synchrotron radiation circular dichroism
Source: Royal Society of Chemistry journal article supplement (doi:10.1039/c5an00066a), 2015-01-01
Supplement: c5an00066a1.pdf [file c5an00066a1.pdf]

SUPPLEMENTARY INFORMATION

**Improved DNA Equilibrium Binding Affinity  
Determinations of Platinum(II) Complexes using  
Synchrotron Radiation Circular Dichroism**

Dale L. Ang,<sup>a</sup> Nykola C. Jones,<sup>b</sup> Frank Stootman,<sup>a</sup> Bahman Ghadiri<sup>a</sup> and  
Janice R. Aldrich-Wright<sup>a\*</sup>

*<sup>a</sup>Nanoscale Organisation and Dynamics Group, School of Science and Health,  
University of Western Sydney, Penrith, NSW, 2751, Australia. Fax: (+61)  
246203025; Tel: (+61) 246203218; E-mail: [J.Aldrich-Wright@uws.edu.au](mailto:J.Aldrich-Wright@uws.edu.au)*

*<sup>b</sup>ISA, Department of Physics and Astronomy, Aarhus University, DK 8000  
Aarhus C, Denmark.*

\* Please address editorial correspondence to Prof. Janice R. Aldrich-Wright via e-mail: [j.aldrich-wright@uws.edu.au](mailto:j.aldrich-wright@uws.edu.au) or via facsimile: +61 2 4620 3025.

## Table of Contents

|                                                   |    |
|---------------------------------------------------|----|
| Table of Contents .....                           | 2  |
| Input Data File CSV format .....                  | 3  |
| Equation Derivation .....                         | 4  |
| Binding Data obtained from SRCD experiments ..... | 7  |
| References .....                                  | 18 |

## Input Data File CSV format

The *Mathematica* notebook accepts a standard CSV file; the path of which must be specified within the notebook. The format is as follows. Cell A1 contains the DNA concentration [M]. The first column contains the wavelengths. Subsequent columns contain the blank/buffer, DNA, followed by the DNA + MC data at the various concentrations.

An example is shown below.

| [DNA conc]   |              |            |                    |                    |
|--------------|--------------|------------|--------------------|--------------------|
|              | Blank/buffer | DNA, no MC | DNA + MC<br>conc 1 | DNA + MC<br>conc 2 |
| Wavelength 1 |              |            |                    |                    |
| Wavelength 2 |              |            |                    |                    |
| Wavelength 3 |              |            |                    |                    |
| Wavelength 4 |              |            |                    |                    |

|          |       |       |            |            |
|----------|-------|-------|------------|------------|
| 0.000035 |       |       |            |            |
|          | 0     | 0     | 0.00000166 | 0.00000332 |
| 400      | 0.366 | 0.475 | 0.397      | 0.415      |
| 399      | 0.355 | 0.442 | 0.426      | 0.467      |
| 398      | 0.346 | 0.455 | 0.412      | 0.437      |
| 397      | 0.345 | 0.457 | 0.443      | 0.441      |
| 396      | 0.384 | 0.511 | 0.418      | 0.416      |

## Equation Derivation

In what follows we use the following labels for description:  $L_F$  (free metal complex concentration),  $S_F$  (free binding site concentration),  $L_B$  (bound metal complex concentration),  $S_B$  (bound/occupied binding site concentration),  $L_T$  (total metal complex concentration) and  $S_T$  (total binding site concentration).

In the original development of the theory the binding equilibrium rate equation is given by,

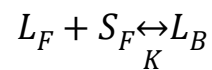

Giving generally,

$$K = \frac{L_B}{L_F \times S_F} \quad (1)$$

The value of  $K$  is assumed to be a constant at a given wavelength and independent of  $L_B$ . Substituting for  $L_F = L_T - L_B$  and  $S_F = S_T - S_B$  into Eq. (1) and making a reasonable assumption that  $S_B = L_B$ , results in a quadratic equation for  $L_B$  which has a solution of

$$L_B = 0.5R \left( \frac{1}{K} + L_T + S_T - \sqrt{\left( \frac{1}{K} + L_T + S_T \right)^2 - 4S_T L_T} \right) \quad (2)$$

where  $R$  is a scaling constant, and  $L_B$  is directly proportional to the measured normalized molar absorption coefficient,  $\varepsilon_M$ . The value of  $K$  can be found by fitting the titration data directly in Eq. (2), which is the preferred approach.<sup>1</sup> The number of DNA binding sites,  $n$ , is related to the total DNA concentration and calculated where  $n = [\text{DNA}]/S_T$ .

In the literature, however, Scatchard,<sup>2</sup> Schmechel and Crothers<sup>3</sup> and others<sup>4-6</sup> have attempted to linearize Eq. (1) by approximation. Substituting the above values in equation (1) gives

$$K = \frac{L_B}{(L_T - L_B)(S_T - L_B)} \quad (3)$$

A rearrangement results in

$$\frac{1}{L_B} = \frac{1}{K(L_T - L_B)L_T} + \frac{1}{L_T} \quad (4)$$

At this point a further assumption is made that at low total ligand concentration  $L_B \rightarrow L_T$  on the RHS of Eq. (4). This implies that by this method  $K$  is an extrapolation as  $L_B \rightarrow 0$ ; this is at best artificial because  $K$  is determined when there is effectively no binding. Such an assumption is not made by Eq. (2). In the literature

Eq. (4) leads to a more traditional form in order to determine  $K$  by using  $\varepsilon_M$  (measured absorbance),  $\varepsilon_B$  (bound absorbance),  $\varepsilon_F$  (free absorbance), and the identity

$$\frac{1}{L_B} = \frac{(\varepsilon_B - \varepsilon_F)}{(\varepsilon_M - \varepsilon_F)} \frac{1}{L_T}$$

To obtain

$$\frac{1}{\varepsilon_M - \varepsilon_F} = \frac{1}{K(\varepsilon_B - \varepsilon_F)} \times \frac{1}{(S_T - L_B)} + \frac{1}{(\varepsilon_B - \varepsilon_F)} \quad (5)$$

)

Plotting the experimentally derived  $\varepsilon_M - \varepsilon_B$  versus  $S_T - L_B$  yields a value of slope and intercept from which  $K$ , again extrapolated to  $L_B \rightarrow 0$ , is found. If the plot is not a straight line (as mathematically it is not), it is argued that a value of  $K$  can be found from the initial slope of the graph. Both approaches determine artificially the binding constant at very low bound ligand concentrations.

## Binding Data obtained from SRCD experiments

**Table S1** Complex 1, [Pt(phen)(en)]<sup>2+</sup> binding data, experiment B.

| Wavelength<br>nm | Binding Constant<br>$K \times 10^5$ | Estimated Binding sites<br>per complex, $n$ |
|------------------|-------------------------------------|---------------------------------------------|
| 297              | $1.1 \pm 0.54$                      | $2.4 \pm 0.1$                               |
| 320              | $5.8 \pm 0.40$                      | $4.3 \pm 0.2$                               |

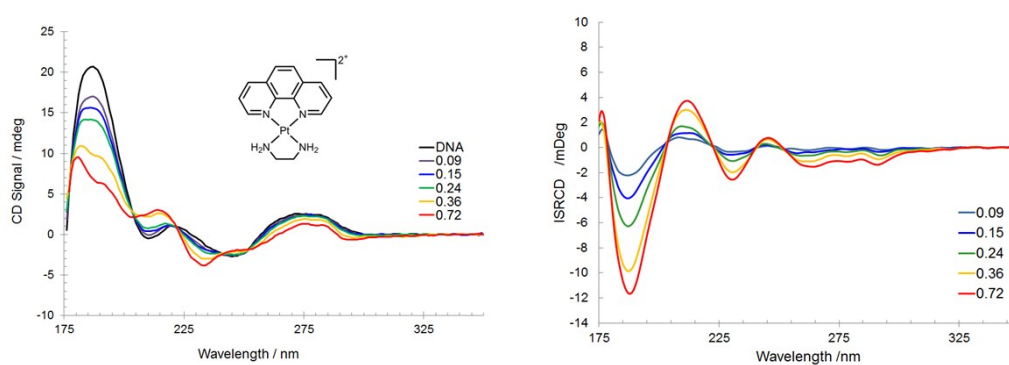

**Figure S1** Expt B – SRCD and ISRCD spectra at different concentrations of metal complex 1, into calf thymus DNA in PS buffer.

**Table S2** Complex **2**, [Pt(4-Mephen)(en)]<sup>2+</sup> binding data, experiment A.

| Wavelength<br>nm | Binding Constant<br>$K \times 10^4$ | Estimated Binding sites<br>per complex, $n$ |
|------------------|-------------------------------------|---------------------------------------------|
| 181              | $2.14 \pm 0.84$                     | $2.6 \pm 0.1$                               |
| 185              | $0.76 \pm 0.09$                     | $3.6 \pm 0.1$                               |
| 186              | $1.08 \pm 0.15$                     | $3.3 \pm 0.1$                               |
| 190              | $1.75 \pm 0.25$                     | $2.8 \pm 0.1$                               |
| 192              | $1.79 \pm 0.14$                     | $2.4 \pm 0.1$                               |
| 194              | $3.37 \pm 0.95$                     | $2.1 \pm 0.1$                               |
| 195              | $1.46 \pm 0.21$                     | $2.1 \pm 0.5$                               |

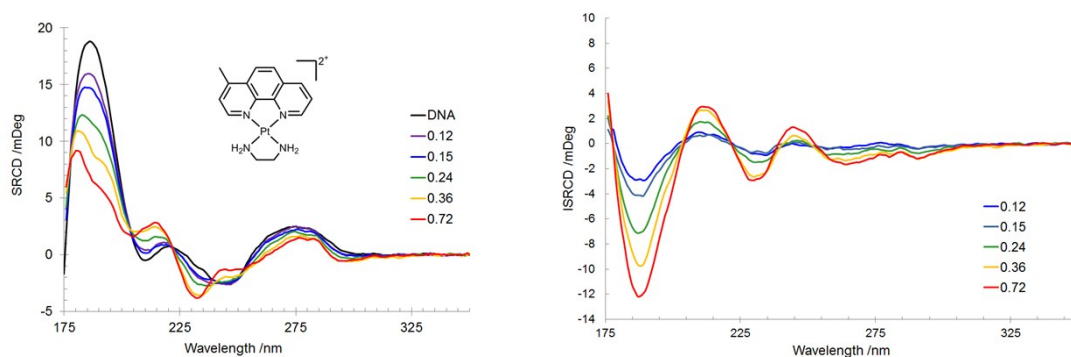

**Figure S2** Expt A – SRCD and ISRCD spectra at different concentrations of metal complex **2**, into ct-DNA in PS buffer.



**Table S3** Complex **2**, [Pt(4-Mephen)(en)]<sup>2+</sup> binding data, experiment B.

| Wavelength<br>nm | Binding Constant<br>$K \times 10^4$ | Estimated Binding sites<br>per complex, $n$ |
|------------------|-------------------------------------|---------------------------------------------|
| 177              | $11.6 \pm 3.0$                      | $2.4 \pm 0.2$                               |
| 184              | $0.95 \pm 0.52$                     | $1.6 \pm 0.0$                               |
| 186              | $1.8 \pm 0.74$                      | $1.7 \pm 0.1$                               |
| 192              | $3.4 \pm 0.52$                      | $1.6 \pm 0.0$                               |
| 194              | $6.3 \pm 3.5$                       | $1.5 \pm 0.0$                               |

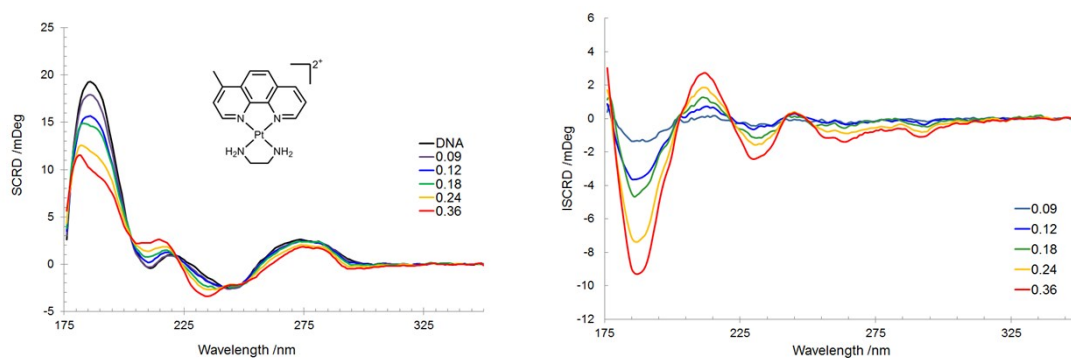

**Figure S3** Expt B - SRCD and ISRCD spectra at different concentrations of metal complex **2**, into ct-DNA in PS buffer.

**Table S4** Complex **3**, [Pt(5-Mephen)(en)]<sup>2+</sup> binding data, experiment A.

| Wavelength<br>nm | Binding Constant<br>$K \times 10^5$ | Estimated Binding sites<br>per complex, $n$ |
|------------------|-------------------------------------|---------------------------------------------|
| 192              | $2.33 \pm 0.18$                     | $2.2 \pm 0.0$                               |
| 193              | $3.34 \pm 0.22$                     | $2.2 \pm 0.0$                               |
| 221              | $1.32 \pm 0.78$                     | $6.5 \pm 1.0$                               |

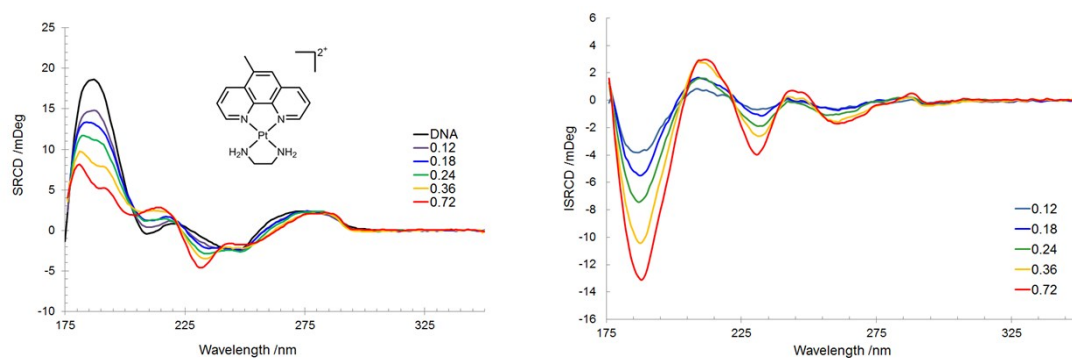

**Figure S4** Expt A - SRCD and ISRCD spectra at different concentrations of metal complex **3**, into ct-DNA in PS buffer.

**Table S5** Complex **3**, [Pt(5-Mephen)(en)]<sup>2+</sup> binding data, experiment B.

| Wavelength<br>nm | Binding Constant<br>$K \times 10^4$ | Estimated Binding sites<br>per complex, $n$ |
|------------------|-------------------------------------|---------------------------------------------|
| 181              | $4.5 \pm 1.9$                       | $2.5 \pm 0.1$                               |
| 185              | $5.8 \pm 1.2$                       | $2.5 \pm 0.1$                               |
| 191              | $8.5 \pm 0.73$                      | $2.4 \pm 0.1$                               |
| 208              | $5.2 \pm 1.2$                       | $4.0 \pm 0.2$                               |
| 210              | $5.6 \pm 0.87$                      | $3.6 \pm 0.2$                               |
| 213              | $2.7 \pm 0.86$                      | $3.9 \pm 0.1$                               |
| 214              | $2.2 \pm 0.42$                      | $4.0 \pm 0.2$                               |
| 215              | $2.4 \pm 0.75$                      | $3.8 \pm 0.1$                               |
| 218              | $1.2 \pm 0.47$                      | $6.0 \pm 0.2$                               |
| 279              | $0.46 \pm 0.10$                     | $1.9 \pm 0.0$                               |
| 330              | $7.0 \pm 0.78$                      | $3.9 \pm 0.3$                               |

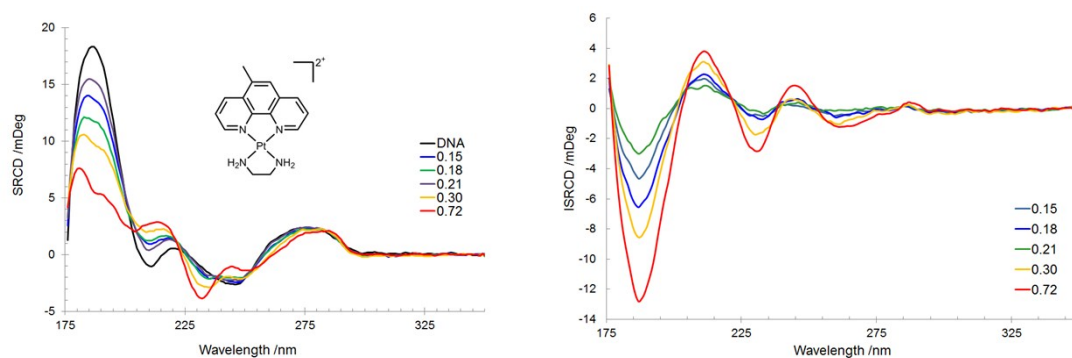

**Figure S5** Expt B - SRCD and ISRCD spectra at different concentrations of metal complex **3**, into ct-DNA in PS buffer.

**Table S6** Complex 4, [Pt(4,7-Me<sub>2</sub>phen)(en)]<sup>2+</sup> binding data, experiment A.

| Wavelength<br>nm | Binding Constant<br>$K \times 10^4$ | Estimated Binding sites<br>per complex, $n$ |
|------------------|-------------------------------------|---------------------------------------------|
| 194              | $4.7 \pm 0.61$                      | $2.6 \pm 0.2$                               |
| 195              | $3.4 \pm 0.70$                      | $2.4 \pm 0.1$                               |
| 199              | $0.35 \pm 0.09$                     | $1.9 \pm 0.0$                               |
| 307              | $33 \pm 1.5$                        | $2.4 \pm 0.1$                               |
| 312              | $24 \pm 1.4$                        | $2.2 \pm 0.1$                               |
| 336              | $1.4 \pm 0.2$                       | $2.1 \pm 0.1$                               |

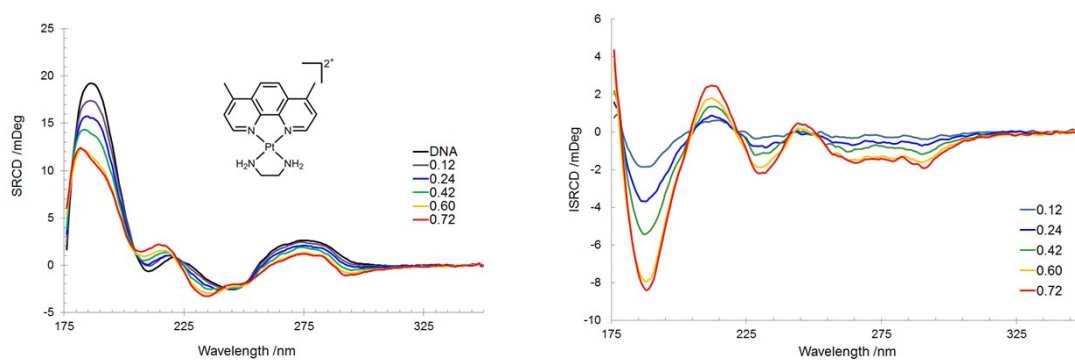

**Figure S6** Expt A - SRCD and ISRCD spectra at different concentrations of metal complex 4, into ct-DNA in PS buffer.

**Table S7** Complex 4, [Pt(4,7-Me<sub>2</sub>phen)(en)]<sup>2+</sup> binding data, experiment B.

| Wavelength<br>nm | Binding Constant<br>$K \times 10^5$ | Estimated Binding sites<br>per complex, $n$ |
|------------------|-------------------------------------|---------------------------------------------|
| 184              | $3.5 \pm 0.28$                      | $2.0 \pm 0.1$                               |
| 209              | $1.9 \pm 0.12$                      | $3.2 \pm 0.1$                               |
| 311              | $8.6 \pm 0.76$                      | $3.6 \pm 0.2$                               |

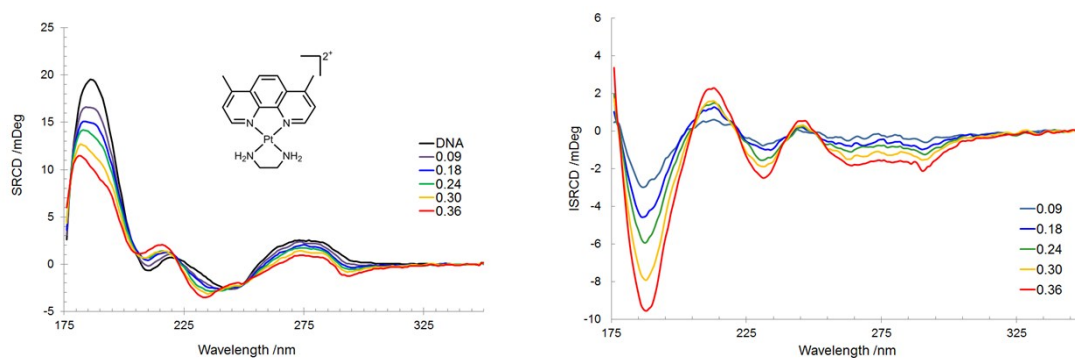

**Figure S7** Expt B - SRCD and ISRCD spectra at different concentrations of metal complex 4, into calf thymus DNA in PS buffer.

**Table S8** Complex 5, [Pt(5,6-Me<sub>2</sub>phen)(en)]<sup>2+</sup> binding data, experiment A.

| Wavelength<br>nm | Binding Constant<br>$K \times 10^4$ | Estimated Binding sites<br>per complex, $n$ |
|------------------|-------------------------------------|---------------------------------------------|
| 207              | $13.4 \pm 0.96$                     | $3.3 \pm 0.1$                               |
| 210              | $6.9 \pm 0.41$                      | $3.2 \pm 0.0$                               |
| 212              | $5.6 \pm 0.33$                      | $3.1 \pm 0.0$                               |
| 214              | $7.3 \pm 0.27$                      | $3.3 \pm 0.0$                               |
| 215              | $9.1 \pm 0.52$                      | $3.3 \pm 0.0$                               |
| 216              | $9.8 \pm 0.34$                      | $3.2 \pm 0.0$                               |
| 220              | $3.3 \pm 0.21$                      | $4.8 \pm 0.1$                               |
| 241              | $0.53 \pm 0.10$                     | $1.6 \pm 0.0$                               |
| 242              | $2.0 \pm 0.35$                      | $2.0 \pm 0.1$                               |
| 298              | $2.2 \pm 0.22$                      | $2.5 \pm 0.1$                               |
| 300              | $0.81 \pm 0.20$                     | $2.8 \pm 0.1$                               |

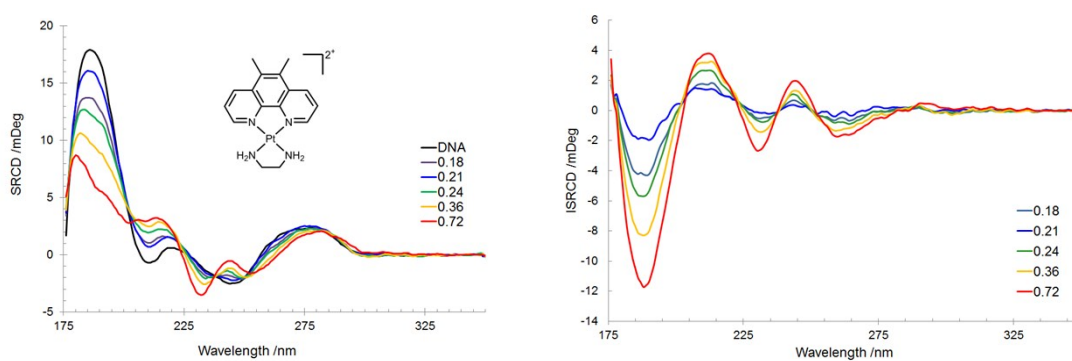

**Figure S8** Expt A - SRCD and ISRCD spectra at different concentrations of metal complex 5, into ct-DNA in PS buffer.

**Table S9** Complex 5, [Pt(5,6-Me<sub>2</sub>phen)(en)]<sup>2+</sup> binding data, experiment B.

| Wavelength<br>nm | Binding Constant<br>$K \times 10^4$ | Estimated Binding sites<br>per complex, $n$ |
|------------------|-------------------------------------|---------------------------------------------|
| 176              | $6.2 \pm 0.98$                      | $1.4 \pm 0.1$                               |
| 181              | $7.4 \pm 1.5$                       | $2.3 \pm 0.1$                               |
| 183              | $2.9 \pm 0.37$                      | $2.4 \pm 0.1$                               |
| 185              | $2.5 \pm 0.13$                      | $2.4 \pm 0.1$                               |
| 186              | $3.5 \pm 0.35$                      | $2.3 \pm 0.1$                               |
| 191              | $4.0 \pm 1.4$                       | $2.2 \pm 0.1$                               |
| 193              | $5.1 \pm 0.39$                      | $2.0 \pm 0.1$                               |
| 235              | $10 \pm 0.73$                       | $2.7 \pm 0.1$                               |
| 259              | $5.3 \pm 0.54$                      | $2.8 \pm 0.1$                               |
| 260              | $1.7 \pm 0.20$                      | $3.2 \pm 0.1$                               |
| 261              | $1.8 \pm 0.16$                      | $3.0 \pm 0.1$                               |
| 262              | $3.8 \pm 0.73$                      | $2.7 \pm 0.1$                               |
| 269              | $8.5 \pm 0.43$                      | $2.6 \pm 0.0$                               |
| 304              | $2.4 \pm 0.23$                      | $2.1 \pm 0.0$                               |
| 329              | $3.6 \pm 1.9$                       | $3.0 \pm 0.2$                               |

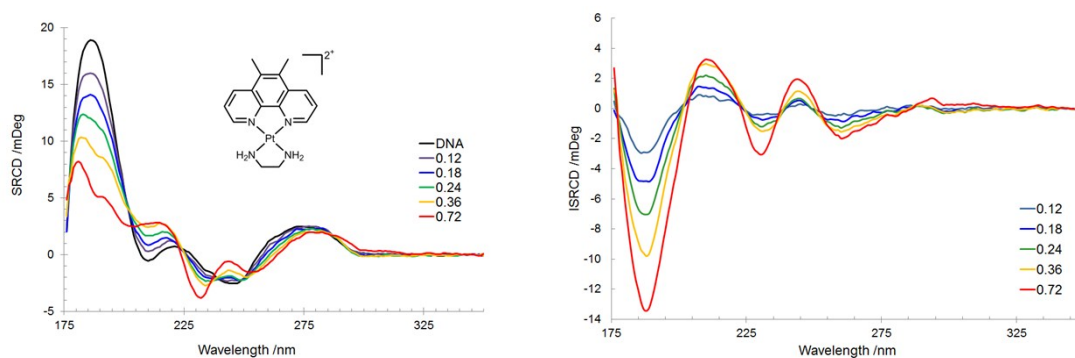

**Figure S9** Expt B - SRCD and ISRCD spectra at different concentrations of metal complex 5, into ct-DNA in PS buffer.

**Table S10** Complex **6**, [Pt(3478-Me<sub>4</sub>phen)(en)]<sup>2+</sup> binding data, experiment A.

| Wavelength<br>nm | Binding Constant<br>$K \times 10^5$ | Estimated Binding sites<br>per complex, $n$ |
|------------------|-------------------------------------|---------------------------------------------|
| 208              | $0.77 \pm 0.13$                     | $4.9 \pm 0.4$                               |
| 254              | $0.71 \pm 0.07$                     | $6.0 \pm 0.4$                               |
| 261              | $0.10 \pm 0.01$                     | $5.2 \pm 0.1$                               |
| 323              | $2.5 \pm 0.27$                      | $4.5 \pm 0.2$                               |
| 330              | $1.1 \pm 0.10$                      | $9.8 \pm 0.5$                               |

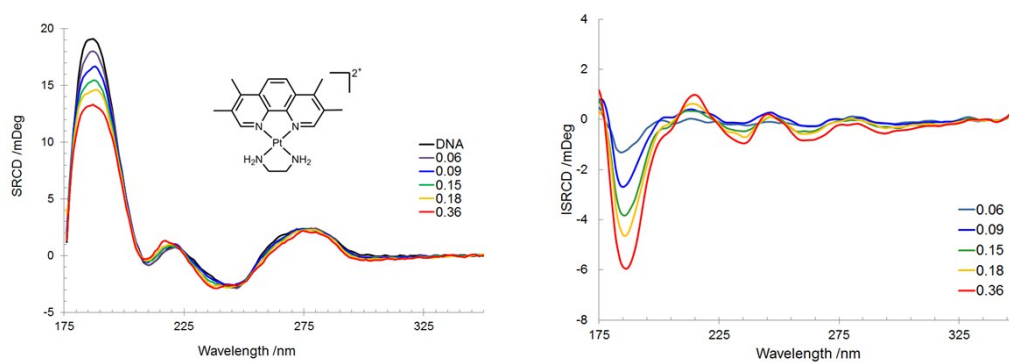

**Figure S10** Expt A - SRCD and ISRCD spectra at different concentrations of metal complex **6**, into ct-DNA in PS buffer.



**Table S11** Complex 6, [Pt(3478-Mephen)(en)]<sup>2+</sup> binding data, experiment B

| Wavelength<br>nm | Binding Constant<br>$K \times 10^4$ | Estimated Binding sites<br>per complex, $n$ |
|------------------|-------------------------------------|---------------------------------------------|
| 300              | $1.6 \pm 0.15$                      | $3.5 \pm 0.1$                               |
| 301              | $2.4 \pm 0.20$                      | $4.7 \pm 0.1$                               |
| 323              | $0.5 \pm 0.19$                      | $5.4 \pm 0.2$                               |

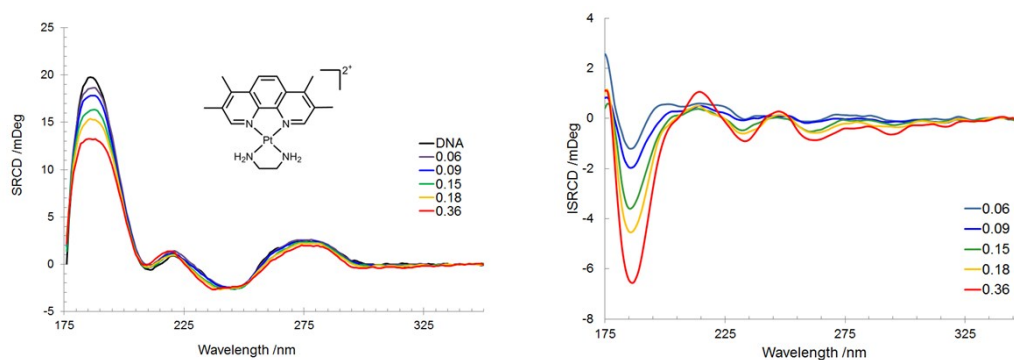

**Figure S11** Expt B - SRCD and ISRCD spectra at different concentrations of metal complex 6, into calf thymus DNA in PS buffer.

## References

1. F. H. Stootman, D. M. Fisher, A. Rodger and J. R. Aldrich-Wright, *The Analyst*, 2006, 131, 1145-1151.
2. G. Scatchard, *Ann. N. Y. Acad. Sci.*, 1949, 51, 660-672.
3. D. E. Schmechel and D. M. Crothers, *Biopolymers*, 1971, 10, 465-480.
4. S. Sarkar and B. Das, *Complex Metals*, 2014, DOI: 10.1080/2164232X.2014.887448, 80-87.
5. H. Wu, F. Kou, F. Jia, B. Liu, J. Yuan and Y. Bai, *Bioinorganic Chemistry and Applications*, 2011, 2011.
6. A. M. Pyle, J. P. Rehmman, R. Meshoyrer, C. V. Kumar, N. J. Turro and J. K. Barton, *Journal of the American Chemical Society*, 1989, 111, 3051-3058.
